# Supplementary material for: Distribution of HPV Genotypes Differs Depending on Behavioural Factors among Young Women
Source: MDPI journal article supplement (doi:10.3390/microorganisms9040750), 2021-04-02
Supplement: s1 [file s1]

**Table S2.** Association between referral cytology and HPV infection among 879 women referred to colposcopy in Finland.

| Referral cytology<br>OR (95% CI)       | HPV 16 vs. LrHPV/HPV-negative |                          |                         |                          |
|----------------------------------------|-------------------------------|--------------------------|-------------------------|--------------------------|
|                                        | <30 y                         | 30-44y                   | ≥45y                    | All women                |
| ASCUS+NILM                             | 1.00                          | 1.00                     | 1.00                    | 1.00                     |
| LSIL                                   | 1.39(0.43-4.49)               | 1.68(0.54-5.20)          | 1.39(0.33-5.77)         | 1.41(0.73-2.75)          |
| ASC-H                                  | <b>3.50(1.14-10.74)</b>       | <b>7.03(2.10-23.50)</b>  | 1.76(0.37-8.32)         | <b>4.25(2.13-8.49)</b>   |
| HSIL                                   | <b>12.75(3.24-50.12)</b>      | <b>23.04(5.73-92.66)</b> | <b>7.50(1.49-37.66)</b> | <b>14.79(6.66-32.85)</b> |
| AGC-NOS                                | NP <sup>a</sup>               | 0.40(0.04-4.24)          | 0.71(0.06-8.15)         | 0.33(0.07-1.59)          |
| AGC-FN                                 | NP <sup>a</sup>               | 0.80(0.07-9.67)          | NP <sup>a</sup>         | 0.70(0.13-3.72)          |
| AGC-NOS/FN                             | 0.75(0.06-9.72)               | 0.53(0.08-3.40)          | 0.45(0.04-4.98)         | 0.44(0.13-1.49)          |
| Not taken                              | 2.25(0.48-10.60)              | 1.00(0.23-4.37)          | NP <sup>a</sup>         | 1.83(0.71-4.72)          |
| nonHPV16- hrHPV vs. LrHPV/HPV-negative |                               |                          |                         |                          |
|                                        | <30y                          | 30-44y                   | ≥45y                    | All women                |
| ASCUS+NILM                             | 1.00                          | 1.00                     | 1.00                    | 1.00                     |
| LSIL                                   | 3.00(1.00-9.02)               | 1.94(0.81-4.63)          | 2.19(0.83-5.75)         | <b>2.33(1.35-4.01)</b>   |
| ASC-H                                  | <b>3.38(1.10-10.38)</b>       | <b>3.14(1.16-8.55)</b>   | 1.88(0.63-5.58)         | <b>2.85(1.55-5.23)</b>   |
| HSIL                                   | <b>7.88(1.95-31.75)</b>       | <b>7.40(2.16-25.31)</b>  | 3.44(0.92-12.79)        | <b>6.41(3.06-13.43)</b>  |
| AGC-NOS                                | 1.50(0.17-12.94)              | 0.33(0.06-1.99)          | 0.54(0.09-3.21)         | 0.56(0.19-1.61)          |
| AGC-FN                                 | NP <sup>a</sup>               | 1.33(0.24-7.28)          | 1.41(0.25-7.90)         | 1.79(0.60-5.38)          |
| AGC-NOS/FN                             | 3.00(0.44-20.44)              | 0.67(0.18-2.46)          | 0.85(0.22-3.33)         | 0.95(0.42-2.15)          |
| Not taken                              | 3.00(0.67-13.40)              | 0.83(0.26-2.66)          | NP <sup>a</sup>         | 1.83(0.81-4.12)          |
| LrHPV vs. HPV-negative                 |                               |                          |                         |                          |
|                                        | <30y                          | 30-44y                   | ≥45y                    | All women                |
| ASCUS+NILM                             | 1.00                          | 1.00                     | 1.00                    | 1.00                     |
| LSIL                                   | 2.50(0.49-12.64)              | 3.00(0.73-12.40)         | 1.50(0.44-5.09)         | 1.80(0.85-3.84)          |
| ASC-H                                  | 0.50(0.10-2.60)               | 0.82(0.13-5.08)          | 0.20(0.03-1.21)         | 0.42(0.16-1.13)          |
| HSIL                                   | 1.00(0.10-9.61)               | 4.50(0.49-41.25)         | NP <sup>a</sup>         | 0.80(0.23-2.80)          |
| AGC-NOS                                | 1.00(0.05-19.96)              | NP <sup>a</sup>          | 0.25(0.02-2.64)         | 0.25(0.05-1.25)          |
| AGC-FN                                 | NP <sup>b</sup>               | 1.50(0.10-23.07)         | NP <sup>a</sup>         | 0.27(0.03-2.44)          |
| AGC-NOS/FN                             | 1.00(0.05-19.96)              | 0.38(0.03-4.37)          | 0.15(0.02-1.50)         | 0.25(0.06-1.00)          |
| Not taken                              | NP <sup>a</sup>               | 1.00(0.16-6.35)          | NP <sup>b</sup>         | 0.37(0.09-1.51)          |

HPV genotypes were grouped into the following categories: 1) HPV 16 vs. LrHPV/HPV-negatives; 2) other hrHPV genotypes (excluding HPV 16) vs. LrHPV/HPV-negative group; and 3) LrHPV (including low-risk multiple HPV infections) vs. HPV-negative. Referral cytology was evaluated in all women and in different age group categories of: <30, 30-44 and ≥45 years old. Statistically significant associations are shown in bold.

HrHPV = high-risk human papillomavirus, LrHPV = low-risk human papillomavirus, NP<sup>a</sup> = Non pertinent due to perfect prediction, NP<sup>b</sup> = Non pertinent due to zero observation, NILM = negative for intraepithelial lesion or malignancy, AS-CUS = atypical squamous cells of undetermined significance, LSIL = low-grade squamous intraepithelial lesion, HSIL = high-grade squamous intraepithelial lesion, ASC-H = atypical squamous cells cannot exclude HSIL, AGC-NOS = atypical glandular cells not otherwise specified, AG-FN = atypical glandular cells that favor neoplasia.
