# Supplementary material for: Distribution of HPV Genotypes Differs Depending on Behavioural Factors among Young Women
Source: MDPI journal article supplement (doi:10.3390/microorganisms9040750), 2021-04-02
Supplement: s1 [file s1]

**Table S1.** Data of different recorded risk factors of 879 women <30, 30-44 and ≥45 years referred to colposcopy.

|                        |                        | <30y<br>n(%) | 30-44y<br>n(%) | ≥45y<br>n(%) | All women<br>n(%) |                        | <30y<br>n(%) | 30-44y<br>n(%) | ≥45y<br>n(%) | All women<br>n(%) |
|------------------------|------------------------|--------------|----------------|--------------|-------------------|------------------------|--------------|----------------|--------------|-------------------|
|                        |                        | 234(26.6)    | 444(50.5)      | 201(22.9)    | 879(100.0)        |                        | 234(26.6)    | 444(50.5)      | 201(22.9)    | 879(100.0)        |
| Contraception          |                        |              |                |              |                   | Age at 1st intercourse |              |                |              |                   |
|                        | No                     | 38(16.3)     | 93(21.1)       | 93(48.2)     | 223(25.8)         | ≤15y                   | 84(36.2)     | 115(26.1)      | 36(17.9)     | 235(26.9)         |
|                        | Condom                 | 56(24.0)     | 139(31.6)      | 41(21.5)     | 236(27.3)         | 16-19y                 | 138(59.5)    | 276(62.7)      | 132(65.7)    | 546(62.5)         |
|                        | E+P <sup>1</sup>       | 85(36.5)     | 75(17.1)       | 7(3.7)       | 167(19.3)         | ≥20y                   | 10(4.3)      | 49(11.1)       | 33(16.4)     | 92(10.5)          |
|                        | Progestin <sup>2</sup> | 32(13.7)     | 32(7.3)        | 7(3.7)       | 71(8.2)           |                        | 232(100.0)   | 440(100.0)     | 201(100.0)   | 873(100.0)        |
|                        | Hormonal-IUD           | 18(7.7)      | 81(18.4)       | 41(21.5)     | 140(16.2)         | Lifetime partners #    |              |                |              |                   |
|                        | Cu-IUD                 | 4(1.7)       | 20(4.6)        | 3(1.6)       | 27(3.1)           | 1-3                    | 24(10.3)     | 54(12.4)       | 39(19.7)     | 117(13.4)         |
|                        |                        | 233(100.0)   | 440(100.0)     | 191(100.0)   | 864(100.0)        | 4-10                   | 97(41.8)     | 161(37.1)      | 80(40.4)     | 338(38.7)         |
| Hormonal contraception |                        |              |                |              |                   | 11-20                  | 65(28.0)     | 135(31.1)      | 42(21.2)     | 242(27.7)         |
|                        | No                     | 98(42.1)     | 252(57.3)      | 136(71.2)    | 486(56.3)         | >20                    | 46(19.8)     | 84(19.4)       | 37(18.7)     | 167(19.1)         |
|                        | Yes                    | 135(57.9)    | 188(42.7)      | 55(28.8)     | 378(43.8)         |                        | 232(100.0)   | 434(100.0)     | 198(100.0)   | 873(100.0)        |
|                        |                        | 233(100.0)   | 440(100.0)     | 191(100.0)   | 864(100.0)        | TOP                    |              |                |              |                   |
| Oral sex               |                        |              |                |              |                   | No                     | 184(78.6)    | 339(76.4)      | 160(79.6)    | 683(77.7)         |
|                        | Never                  | 9(3.9)       | 39(8.9)        | 48(24.2)     | 96(11.1)          | Yes                    | 50(21.4)     | 105(23.6)      | 41(20.4)     | 196(22.3)         |
|                        | Ever/Regularly         | 223(96.1)    | 397(91.1)      | 150(75.8)    | 770(88.9)         |                        | 234(100.0)   | 444(100.0)     | 201(100.0)   | 879(100.0)        |
|                        |                        | 232(100.0)   | 436(100.0)     | 198(100.0)   | 866(100.0)        | Vitamine-D usage       |              |                |              |                   |
| Anal sex               |                        |              |                |              |                   | No                     | 123(53.0)    | 191(43.2)      | 82(41.0)     | 396(45.3)         |
|                        | Never                  | 171(74.7)    | 306(70.0)      | 155(78.3)    | 632(73.1)         | Yes                    | 109(47.0)    | 251(56.8)      | 118(59.0)    | 478(54.7)         |
|                        | Ever/Regularly         | 58(25.3)     | 131(30.0)      | 43(21.7)     | 232(26.9)         |                        | 232(100.0)   | 442(100.0)     | 200(100.0)   | 874(100.0)        |
|                        |                        | 229(100.0)   | 437(100.0)     | 198(100.0)   | 864(100.0)        | Atopia                 |              |                |              |                   |
| Parity                 |                        |              |                |              |                   | No                     | 185(80.4)    | 357(81.0)      | 163(81.9)    | 705(81.0)         |
|                        | 0                      | 187(79.9)    | 182(41.0)      | 31(15.4)     | 400(45.5)         | Yes                    | 45(19.6)     | 84(19.0)       | 36(18.1)     | 165(19.0)         |
|                        | 1-2                    | 47(20.1)     | 200(45.0)      | 111(55.2)    | 358(40.7)         |                        | 230(100.0)   | 441(100.0)     | 199(100.0)   | 870(100.0)        |
|                        | ≥3                     | 0(0.0)       | 62(14.0)       | 59(29.4)     | 121(13.8)         | Miscarriages           |              |                |              |                   |
|                        |                        | 234(100.0)   | 444(100.0)     | 201(100.0)   | 879(100.0)        | No                     | 221(94.4)    | 360(81.1)      | 166(82.6)    | 747(85.0)         |
| Use of alcohol         |                        |              |                |              |                   | Yes                    | 13(5.6)      | 84(18.9)       | 35(17.4)     | 132(15.0)         |
|                        | no                     | 22(9.5)      | 40(9.1)        | 19(9.6)      | 81(9.3)           |                        | 234(100.0)   | 444(100.0)     | 201(100.0)   | 879(100.0)        |
|                        | <6 doses/use           | 12(5.2)      | 74(16.9)       | 57(28.6)     | 143(16.5)         | Drugs                  |              |                |              |                   |
|                        | >6doses/use            | 197(85.3)    | 324(74.0)      | 123(61.8)    | 644(74.2)         | Never                  | 182(78.1)    | 342(77.4)      | 183(91.0)    | 707(80.7)         |
|                        |                        | 231(100.0)   | 438(100.0)     | 199(100.0)   | 868(100.0)        | Yes/tried              | 51(21.9)     | 100(22.6)      | 18(9.0)      | 169(19.3)         |
| Smoking                |                        |              |                |              |                   |                        | 233(100.0)   | 442(100.0)     | 201(100.0)   | 876(100.0)        |
|                        | No                     | 103(44.0)    | 188(42.3)      | 94(46.8)     | 385(43.8)         | Referral cytology      |              |                |              |                   |
|                        | Yes                    | 59(25.2)     | 117(26.4)      | 37(18.4)     | 213(24.2)         | ASCUS                  | 28(12.0)     | 28(6.3)        | 23(11.4)     | 79(9.0)           |
|                        | Ex                     | 72(30.8)     | 139(31.3)      | 70(34.8)     | 281(32.0)         | LSIL                   | 55(23.5)     | 182(41.0)      | 88(43.8)     | 325(37.0)         |
|                        |                        | 234(100.0)   | 444(100.0)     | 201(100.0)   | 879(100.0)        | ASC-H                  | 67(28.6)     | 99(22.3)       | 40(19.9)     | 206(23.4)         |
| >1 partner in 12mo     |                        |              |                |              |                   | HSIL                   | 59(25.2)     | 90(20.3)       | 26(12.9)     | 175(19.9)         |
|                        | 0-1                    | 181(78.4)    | 360(82.6)      | 179(90.4)    | 720(83.2)         | AGC-NOS                | 4(1.7)       | 9(2.0)         | 10(5.0)      | 23(2.6)           |
|                        | >1                     | 50(21.6)     | 76(17.4)       | 19(9.6)      | 145(16.8)         | AGC-FN                 | 3(1.3)       | 8(1.8)         | 7(3.5)       | 18(2.0)           |
|                        |                        | 231(100.0)   | 436(100.0)     | 198(100.0)   | 865(100.0)        | NILM                   | 0(0.0)       | 1(0.2)         | 3(1.5)       | 4(0.5)            |
|                        |                        |              |                |              |                   | Not taken              | 18(7.7)      | 27(6.1)        | 4(2.0)       | 49(5.6)           |

---

|            |            |            |            |
|------------|------------|------------|------------|
| 234(100.0) | 444(100.0) | 201(100.0) | 879(100.0) |
|------------|------------|------------|------------|

---

<sup>1</sup>E+P includes estrogen and progestin pills, contraceptive patches and rings

<sup>2</sup>Progestin includes progestin pills and implants

Cu-IUD = copper-releasing intrauterine device, Hormonal-IUD = Levonorgestrel-releasing IUD, HrHPV = high-risk human papillomavirus, LrHPV = low-risk human papillomavirus, NP<sup>a</sup> = Non pertinent due to perfect prediction, NP<sup>b</sup> = Non pertinent due to zero observation, TOP = termination of pregnancy, NILM = negative for intraepithelial lesion or malignancy, AS-CUS = atypical squamous cells of undetermined significance, LSIL = low-grade squamous intraepithelial lesion, HSIL = high-grade squamous intraepithelial lesion, ASC-H = atypical squamous cells cannot exclude HSIL, AGC-NOS = atypical glandular cells not otherwise specified, AG-FN = atypical glandular cells that favor neoplasia.
