# Supplementary material for: Distribution of HPV Genotypes Differs Depending on Behavioural Factors among Young Women
Source: MDPI journal article supplement (doi:10.3390/microorganisms9040750), 2021-04-02
Supplement: s1 [file s1]

**Table S4.** Data of smoking years among currently smoking and former smoking women  $\geq 45$  years old referred to colposcopy in Finland.

| Smoking status | Smoker    | Ex-smoker |
|----------------|-----------|-----------|
|                | n(%)      | n(%)      |
| Smoking years  |           |           |
| ≤5             | 0(0.0)    | 18(27.3)  |
| 6-10           | 2(5.6)    | 19(28.8)  |
| 11-20          | 9(25.0)   | 18(27.3)  |
| >20            | 25(69.4)  | 11(16.7)  |
|                | 36(100.0) | 66(100.0) |
