# Supplementary material for: Distribution of HPV Genotypes Differs Depending on Behavioural Factors among Young Women
Source: MDPI journal article supplement (doi:10.3390/microorganisms9040750), 2021-04-02
Supplement: s1 [file s1]

**Table S3.** Association between HPV16 infection and smoking years among women referred to colposcopy in Finland.

| Recorded risk factors                                                                            |      | HPV16 vs. low-risk HPV/HPV-negative |                        |                 |                        |
|--------------------------------------------------------------------------------------------------|------|-------------------------------------|------------------------|-----------------|------------------------|
| OR (95% CI)                                                                                      |      | <30y                                | 30-44y                 | ≥45y            | All women              |
| Smoking years                                                                                    |      |                                     |                        |                 |                        |
|                                                                                                  | No   | 1.00                                | 1.00                   | 1.00            | 1.00                   |
|                                                                                                  | <11y | <b>2.60(1.24-5.44)</b>              | <b>2.91(1.51-5.59)</b> | 2.08(0.73-5.89) | <b>2.92(1.90-4.49)</b> |
|                                                                                                  | ≥11y | <b>8.42(1.00-70.64)</b>             | <b>2.77(1.46-5.25)</b> | 0.84(0.30-2.37) | <b>1.84(1.16-2.91)</b> |
| Smoking years where analysed in all women and in age groups of:<br><30, 30-44 and ≥45 years old. |      |                                     |                        |                 |                        |
